# Supplementary material for: Apibacter adventoris gen. nov., sp. nov., a member of the phylum Bacteroidetes isolated from honey bees
Source: PubMed Central journal article supplement — Int J Syst Evol Microbiol. 2016 Mar 1;66(3):1323–9. doi: 10.1099/ijsem.0.000882 (PMC7442301; doi:10.1099/ijsem.0.000882), 2016-03-01
Supplement: ijsem-66-1323-s001.pdf [file ijsem-66-1323-s001.pdf]

## Supplementary Material

*Apibacter adventoris* gen. nov., sp. nov., a member of the phylum *Bacteroidetes* isolated from honey bees

Waldan K. Kwong<sup>1,2</sup> and Nancy A. Moran<sup>2</sup>

<sup>1</sup> Dept. of Ecology and Evolutionary Biology, Yale University, New Haven, CT USA

<sup>2</sup> Dept. of Integrative Biology, University of Texas, Austin, TX USA

Address correspondence to: Waldan K. Kwong; Email: [waldan.kwong@yale.edu](mailto:waldan.kwong@yale.edu)

**Table S1.** Strain source information and full-length 16S rRNA identity to close relatives.

Strains: 1, *Empedobacter brevis* CCUG7320<sup>T</sup>; 2, *Ornithobacterium rhinotracheale* LMG 9086<sup>T</sup>; 3, *Chryseobacterium gleum* ATCC 35910<sup>T</sup>; 4, *Flavobacterium aquatile* LMG 4008<sup>T</sup>.

| Strain              | Host                | Location                                     | 16S rRNA identity (%) to |        |        |      |      |      |      |
|---------------------|---------------------|----------------------------------------------|--------------------------|--------|--------|------|------|------|------|
|                     |                     |                                              | wkB301 <sup>T</sup>      | wkB180 | wkB309 | 1    | 2    | 3    | 4    |
| wkB301 <sup>T</sup> | <i>Apis dorsata</i> | University of Malaya, Kuala Lumpur, Malaysia | -                        | 99.5   | 95.8   | 87.6 | 87.5 | 87.2 | 85.5 |
| wkB180              | <i>Apis dorsata</i> | HortPark, Singapore                          | 99.5                     | -      | 95.9   | 87.6 | 87.5 | 87.1 | 85.4 |
| wkB309              | <i>Apis cerana</i>  | Genting Highlands, Malaysia                  | 95.8                     | 95.9   | -      | 88.4 | 87.5 | 86.3 | 85.7 |

**Table S2.** Deposited sequences from this study.

| <b>Gene</b>               | <b>Length (bp)</b> | <b>GenBank accession no.</b> |
|---------------------------|--------------------|------------------------------|
| <b>wkB301<sup>T</sup></b> |                    |                              |
| 16S rRNA                  | 1528               | KT149221                     |
| <i>alaS</i>               | 2607               | KT149224                     |
| <i>atpA</i>               | 1581               | KT149227                     |
| <i>dnaA</i>               | 1431               | KT149230                     |
| <i>dnaN</i>               | 1116               | KT149233                     |
| <i>ftsZ</i>               | 1839               | KT149236                     |
| <i>fusA</i>               | 2130               | KT149239                     |
| <i>groEL</i>              | 1629               | KT149242                     |
| <i>gyrB</i>               | 1938               | KT149245                     |
| <i>lepA</i>               | 1794               | KT149248                     |
| <i>metK</i>               | 1269               | KT149251                     |
| <i>nusG</i>               | 546                | KT149254                     |
| <i>pfkA</i>               | 993                | KT149257                     |
| <i>pyrG</i>               | 1644               | KT149260                     |
| <i>recA</i>               | 1014               | KT149263                     |
| <i>rplA</i>               | 693                | KT149266                     |
| <i>rplB</i>               | 822                | KT149269                     |
| <i>rpoB</i>               | 3825               | KT149272                     |
| <i>rpsB</i>               | 801                | KT149275                     |
| <i>sdhA</i>               | 2016               | KT149278                     |
| <i>secA</i>               | 3324               | KT149281                     |
| <b>wkB180</b>             |                    |                              |
| 16S rRNA                  | 1529               | KT149222                     |
| <i>alaS</i>               | 2607               | KT149225                     |
| <i>atpA</i>               | 1581               | KT149228                     |
| <i>dnaA</i>               | 1431               | KT149231                     |
| <i>dnaN</i>               | 1116               | KT149234                     |
| <i>ftsZ</i>               | 1839               | KT149237                     |
| <i>fusA</i>               | 2130               | KT149240                     |
| <i>groEL</i>              | 1629               | KT149243                     |
| <i>gyrB</i>               | 1938               | KT149246                     |
| <i>lepA</i>               | 1794               | KT149249                     |
| <i>metK</i>               | 1269               | KT149252                     |
| <i>nusG</i>               | 546                | KT149255                     |
| <i>pfkA</i>               | 993                | KT149258                     |
| <i>pyrG</i>               | 1644               | KT149261                     |
| <i>recA</i>               | 1014               | KT149264                     |
| <i>rplA</i>               | 693                | KT149267                     |

|             |      |          |
|-------------|------|----------|
| <i>rplB</i> | 822  | KT149270 |
| <i>rpoB</i> | 3825 | KT149273 |
| <i>rpsB</i> | 801  | KT149276 |
| <i>sdhA</i> | 2016 | KT149279 |
| <i>secA</i> | 3324 | KT149282 |

**wkB309**

|              |      |          |
|--------------|------|----------|
| 16S rRNA     | 1527 | KT149220 |
| <i>alaS</i>  | 2610 | KT149223 |
| <i>atpA</i>  | 1578 | KT149226 |
| <i>dnaA</i>  | 1431 | KT149229 |
| <i>dnaN</i>  | 1116 | KT149232 |
| <i>ftsZ</i>  | 1827 | KT149235 |
| <i>fusA</i>  | 2130 | KT149238 |
| <i>groEL</i> | 1629 | KT149241 |
| <i>gyrB</i>  | 1938 | KT149244 |
| <i>lepA</i>  | 1821 | KT149247 |
| <i>metK</i>  | 1269 | KT149250 |
| <i>nusG</i>  | 546  | KT149253 |
| <i>pfkA</i>  | 993  | KT149256 |
| <i>pyrG</i>  | 1653 | KT149259 |
| <i>recA</i>  | 1023 | KT149262 |
| <i>rplA</i>  | 693  | KT149265 |
| <i>rplB</i>  | 822  | KT149268 |
| <i>rpoB</i>  | 3825 | KT149271 |
| <i>rpsB</i>  | 801  | KT149274 |
| <i>sdhA</i>  | 2016 | KT149277 |
| <i>secA</i>  | 3333 | KT149280 |

**Table S3.** Antibiotic resistances of strains wkB301<sup>T</sup> and wkB309. Strains were grown on heart infusion agar supplemented with 5% sheep blood at 35°C and 5% CO<sub>2</sub>. Minimum inhibitory concentration strips were read after 2–3 days growth. Strips were manufactured by bioMérieux unless otherwise indicated.

| Antibiotic                 | Minimum inhibitory concentration (µg) |        |
|----------------------------|---------------------------------------|--------|
|                            | wkB301 <sup>T</sup>                   | wkB309 |
| Ampicillin                 | 0.094                                 | 0.75   |
| Chloramphenicol            | 1.5                                   | 8      |
| Gentamicin                 | 96                                    | >256   |
| Kanamycin (Liofilchem)     | >256                                  | 128    |
| Spectinomycin (Liofilchem) | 1.5                                   | 8      |
| Streptomycin (Liofilchem)  | >256                                  | 6      |
| Tetracycline               | 1                                     | 2      |

**Table S4.** Fatty acid profiles of strains wkB301<sup>T</sup>, wkB309, and related *Flavobacteriaceae*.

Strains: 1, wkB301<sup>T</sup>; 2, wkB309; 3, *Empedobacter brevis* CCUG7320<sup>T</sup>; 4, *Ornithobacterium rhinotracheale* (multiple strains); 5, *Chryseobacterium gleum* (multiple strains). Unknown fatty acids and those comprising <1% of total are not listed. Values given as percentages; -, not detected. Distinguishing fatty acids are bolded.

| Fatty acid                                                                                  | 1            | 2            | 3 <sup>a</sup> | 4 <sup>b</sup> | 5 <sup>c</sup> |
|---------------------------------------------------------------------------------------------|--------------|--------------|----------------|----------------|----------------|
| Straight-chain                                                                              |              |              |                |                |                |
| C <sub>14:0</sub>                                                                           | <1           | 1.40         | -              | <1             | -              |
| C <sub>16:0</sub>                                                                           | <b>15.15</b> | <b>21.59</b> | 4.0            | 2.9            | 1              |
| C <sub>18:0</sub>                                                                           | 1.04         | <1           | <1             | -              | -              |
| Branched                                                                                    |              |              |                |                |                |
| C <sub>14:0</sub> iso                                                                       | <1           | 1.45         | -              | -              | -              |
| C <sub>15:0</sub> iso                                                                       | 23.24        | 15.44        | 24.5           | 57.4           | 35             |
| C <sub>15:0</sub> anteiso                                                                   | 1.46         | 1.99         | -              | <1             | <1             |
| C <sub>17:0</sub> iso                                                                       | 1.84         | 1.32         | <1             | 1.5            | 2              |
| C <sub>17:1</sub> iso I and/or                                                              | -            | -            | 8.1            | -              | <1             |
| C <sub>17:1</sub> anteiso B                                                                 | -            | -            | -              | -              | -              |
| Unsaturated                                                                                 |              |              |                |                |                |
| C <sub>15:1</sub> ω6c                                                                       | -            | -            | 2.2            | -              | -              |
| C <sub>16:1</sub> ω5c                                                                       | -            | -            | 5.5            | -              | -              |
| C <sub>16:1</sub> ω7c and/or                                                                | 9.58         | <1           | 15.5           | -              | -              |
| C <sub>16:1</sub> ω6c                                                                       | -            | -            | -              | -              | -              |
| C <sub>17:1</sub> iso ω9c                                                                   | -            | -            | 1.7            | -              | 20             |
| C <sub>18:1</sub> ω9c                                                                       | 2.46         | 1.72         | -              | -              | -              |
| Hydroxy                                                                                     |              |              |                |                |                |
| C <sub>15:0</sub> 2-OH                                                                      | <1           | <1           | 1.4            | -              | -              |
| C <sub>15:0</sub> iso 3-OH                                                                  | 4.53         | 3.97         | 7.3            | 8.1            | 3              |
| C <sub>16:0</sub> 2-OH                                                                      | <1           | 1.63         | -              | -              | -              |
| C <sub>16:0</sub> 3-OH                                                                      | <b>10.98</b> | <b>13.77</b> | 3.5            | 2.8            | 1              |
| C <sub>16:0</sub> iso 3-OH                                                                  | <1           | 1.05         | -              | -              | 1              |
| C <sub>17:0</sub> iso 3-OH                                                                  | 18.05        | 22.18        | 17.6           | 20.2           | 22             |
| Summed feature                                                                              |              |              |                |                |                |
| C <sub>15:0</sub> iso 2-OH<br>and/or C <sub>16:1</sub> ω7c<br>and /or C <sub>16:1</sub> ω7t | -            | -            | -              | -              | 12             |
| Summed feature                                                                              |              |              |                |                |                |
| C <sub>18:2</sub> ω6,9c<br>and /or C <sub>18:0</sub> ante                                   | 4.00         | 5.51         | -              | -              | -              |

<sup>a</sup> Data from Zhang *et al.* (2014).

<sup>b</sup> Data from Vandamme *et al.* (1994), 21 strains.

<sup>c</sup> Data from Bernardet *et al.* (2006), 5 strains.

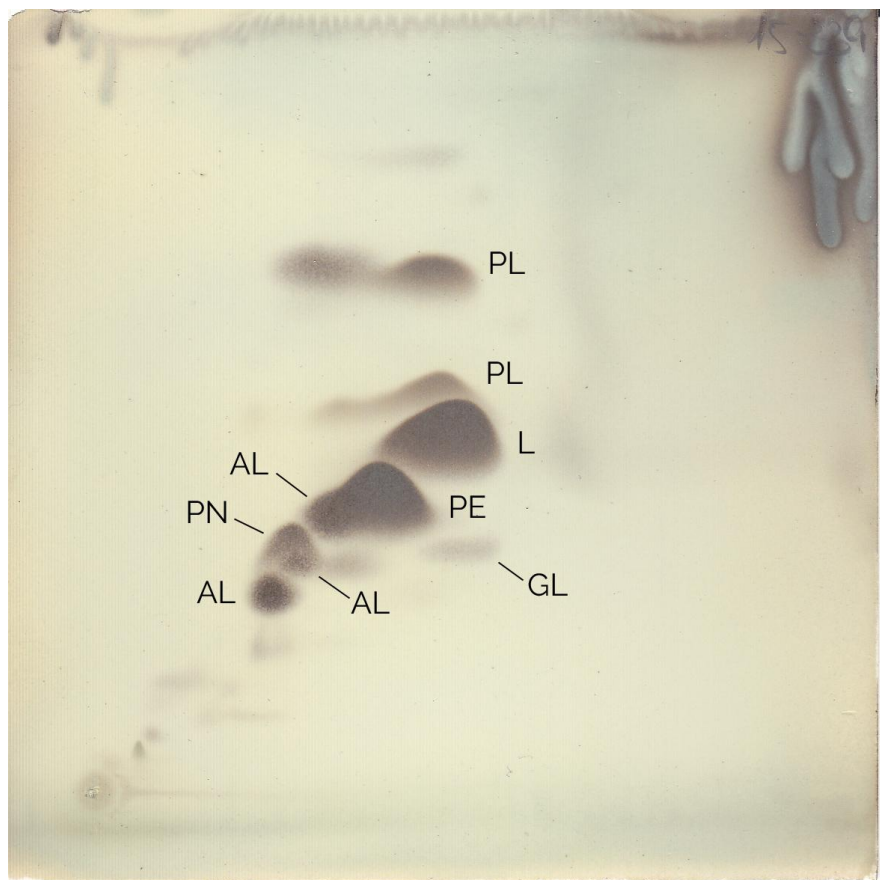

**Figure S1.** Polar lipid composition of strain wkB301<sup>T</sup>, from two-dimensional silica gel thin layer chromatography (DSMZ, Braunschweig, Germany). AL, aminolipid; GL, glycolipid; L, lipid; PE, phosphatidylethanolamine; PL, phospholipid; PN, phosphoaminolipid.
